# Supplementary material for: The Effects of Human BDH2 on the Cell Cycle, Differentiation, and Apoptosis and Associations with Leukemia Transformation in Myelodysplastic Syndrome
Source: Int J Mol Sci. 2020 Apr 25;21(9):3033. doi: 10.3390/ijms21093033 (PMC7246807; doi:10.3390/ijms21093033)
Supplement: Supplementary file 1 [file ijms-21-03033-s001.pdf]

## **Supplement Methods**

### ***Cell Culture***

The THP1, acute myelomonocytic leukemia cell line, was cultured in RPMI medium (GIBCO, Life Technologies, Carlsbad, CA, USA) supplemented with 10% fetal bovine serum (FBS), 1% streptomycin and penicillin (P/S), 4.5 g/L glucose, 10 mM HEPES ((4-(2-hydroxyethyl)-1-piperazineethanesulfonic acid), 1 mM sodium pyruvate, and 1%  $\beta$ -mercaptoethanol. Puromycin (1  $\mu$ g/mL) (Sigma, St. Louis, MO, USA) was added for stress selection of THP1 cells infected with shRNA empty vector and shRNA-BDH2 lentivirus. Approximately  $1 \times 10^5$  cells were plated in 10 cm dishes and cultured at 37°C in a humidified atmosphere containing 5% CO<sub>2</sub>. Native cell line was purchased from the Food Industry Research and Development Institute, Taiwan, in 2012, May. The THP1 cell line was confirmed mycoplasma free but was not authenticated. However, we amplified cells when we received and used the initial stocked cells to do study.

### ***mRNA Isolation and Expression***

BM was obtained by sternal or posterior iliac bone aspiration and collected into heparin tubes containing 60 USP unit of sodium heparin. Total RNA was extracted from BM buffy coat samples of the enrolled patients and BDH2-KD THP1 cells using Trizol (Invitrogen, Life Technologies). The RNA input (2  $\mu$ g) for cDNA

synthesis was determined by measuring OD<sub>260</sub>. RNA was transcribed to first-strand

cDNA by using TaqMan<sup>®</sup> High Capacity Reverse Transcription Kit (Applied

Biosystems, Life Technologies), according to the manufacturer's instructions.

The cDNA sequences of *BDH2* and *LCN2* were evaluated, and the specific forward

and reverse primers and TaqMan<sup>®</sup> probe were designed using Primer Express

software version 1.5 (Applied Biosystems, Life Technologies). The TaqMan<sup>®</sup> MGB

probe was synthesized and labeled with fluorescein amidite (FAM) fluorescent dye

(Applied Biosystems, Life Technologies).

mRNA expression levels of *BDH2* and *LCN2* were analyzed by qRT-PCR using the

following primer sets and probes.

*BDH2*: Forward primer 5'-TTCCAGCGTCAAAGGAGTTGT-3',

reverse primer 5'-TTCCTGGGCACACACAGTTG-3',

TaqMan<sup>®</sup> MGB probe 5'-ACAGATGTGTGTGTACAGCAC-3',

*LCN2*: Forward primer 5'-GGTATGTGGTAGGCCTGGCA-3',

reverse primer 5'-AACAGGACGGAGGTGACATTGT-3',

TaqMan<sup>®</sup> MGB probe 5'-ACCCGCAAAAGATGTA-3'.

All the reactions were carried out in a 25µL final volume containing 200 ng of cDNA

(as total input RNA), 400 nM of each primer, 200 nM of probe, and 12.5µL of 2X

TaqMan<sup>®</sup> Universal PCR Master Mix (Applied Biosystems, Life Technologies).

qRT-PCR was performed in an ABI Villi 7 Sequence Detector (Applied Biosystems, Life Technologies), employing the following PCR cycling parameters: 95°C for 10 min, followed by 40 cycles at 95°C for 20 s, and 60°C for 1 min. The expression levels of the *BDH2* and *LCN2* genes were normalized to the internal control  $\beta$ -actin to obtain the relative threshold cycle ( $\Delta C_T$ ). The  $C_T$  values of  $\beta$ -actin were controlled between 18 and 22.

### ***Western Blot Analysis***

Cells were lysed in cold lysis buffer (triton glycerol cell lysis buffer containing 1/1000 volumes of phenyl-methyl-sulfonyl fluoride in 200 mM of 100 × ethanol stored at 4°C) with protease inhibitor cocktail (Amresco LLC, Solon, OH, USA). Cell lysates were separated by SDS-PAGE and transferred to a polyvinylidene fluoride (PVDF) membrane (PerkinElmer, Waltham, MA, USA). Further, the PVDF membrane was probed with primary antibodies specific for BDH (Sigma), and  $\beta$ -actin (Millipore Corporation, Billerica, MA, USA) and appropriate secondary antibodies were added. After incubation with antibodies, proteins were detected with an enhanced chemiluminescence kit (ECL; PerkinElmer).

### ***Cell Cycle Analysis***

THP1 cells were cultured in serum-free medium for 2 days to induce cell cycle arrest. Thereafter, the medium was supplemented with 0.2% FBS and 1% FBS for a day each, and 10% FBS was added to the culture medium to restart the cell cycle. Approximately  $5 \times 10^6$  cells were collected, washed with cold phosphate buffered saline (PBS), and re-suspended in 50  $\mu$ L PBS. A total volume of 3 mL of 70% cold ethanol was then added drop by drop. The samples were incubated at  $-20^\circ\text{C}$  for 1 h and centrifuged at  $300 \times g$  for 5 min. The supernatant was removed, and the cell pellet was washed twice with 5 mL cold PBS, re-suspended in 1 mL protease inhibitor (PI)/Triton X-100 (PI 20  $\mu\text{g/mL}$ ; Triton-X 100 0.1%; RNase A 0.2 mg/mL) (PI from Beckman Coulter; Triton-X 100 and RNase A from Sigma), and incubated at room temperature for 30 min. Cell cycle was analyzed by flow cytometry.

### ***Flow Cytometry and Cell Differentiation***

Flow cytometry was performed using Gallios™ flow cytometer (Beckman Coulter, USA). A total of  $1 \times 10^6$  cells were collected, washed with cold PBS, re-suspended in 500  $\mu$ L PBS, and double stained with 100  $\mu\text{L/mL}$  CD markers for 20 min. THP1 cells were initiated to differentiate along the monocytic lineage following exposure to 1,25-dihydroxyvitamin D3 (Vit D3; Sigma) as described previously.<sup>22</sup> Approximately,  $2.5 \times 10^5$  THP1 cells/mL were treated with  $10^{-7}$  M Vit D3 in a

humidified atmosphere containing 5% CO<sub>2</sub>, for 72 h at 37°C. Cell differentiation was detected by using the following antibodies: CD11b-PE and CD15-FITC, CD14-PE and CD64-FITC, CD16-PE and CD14-FITC double stain, and immunoglobulin G1-PE and immunoglobulin G1-FITC double stain (control markers) (Beckman Coulter).

### ***Special stains***

THP1 cells were prepared by cytopspin after washing twice with PBS. For Liu stain, cells were stained with Liu A solution for 30 s and Liu B solution for 1 min. Cells were washed with water and observed under a microscope. For myeloperoxidase (MPO) staining, cells were fixed with 10% ethanol-formalin for 1 min, washed and dried, and then stained by POX staining solution for 30 s, followed by washing and drying and finally staining with Neutral Red for 30 s. For nonspecific esterase (NSE) staining, cells were fixed with buffered formol-acetone fixation buffer for 30 s. Staining solution was prepared by mixing 10 µL  $\alpha$ -naphthyl butyrate, 500 µL ethylene glycol mono-methyl ether, and 100 µL solution of 4% pararosaniline HCL and 4% NaNO<sub>2</sub>; the volume was made up to 10 mL by adding 9.4 mL PBS. Fixed cells were stained with staining solution for 45 min, and washed and dried again. Finally, the cells were stained with hematoxylin for 10 min, followed by washing and drying of

the stained cells.

### ***Immunohistochemistry***

For preparing slides, 5- $\mu$ m thick sections from representative tissue blocks were cut, de-paraffinized with xylene, rinsed, and rehydrated with a graded alcohol series (100%, 95%, 85%, and 75%) for 5 min each, and then finally rinsed with distilled water. The slides were autoclaved in sodium citrate buffer (10 mM, pH 6.0) for 30 min to enhance antigen retrieval. Endogenous peroxidase activity was quenched by incubation in 3% H<sub>2</sub>O<sub>2</sub>/methanol buffer for 30 min. The slides were incubated with a monoclonal antibody against human BDH2 (sc-104197, Santa Cruz Biotechnology, Dallas, TX, USA) at a dilution of 1:200 overnight at 4°C in humidified chambers. These slides were washed three times in PBS and incubated with a biotinylated secondary antibody for 30 min at room temperature. Antigen-antibody complexes were detected by the avidin-biotin-peroxidase method using 3,3-diaminobenzidine as a chromogenic substrate (Dako, Glostrup, Denmark). Finally, the slides were counterstained with hematoxylin and then examined by light microscopy.

**Figure S1.**

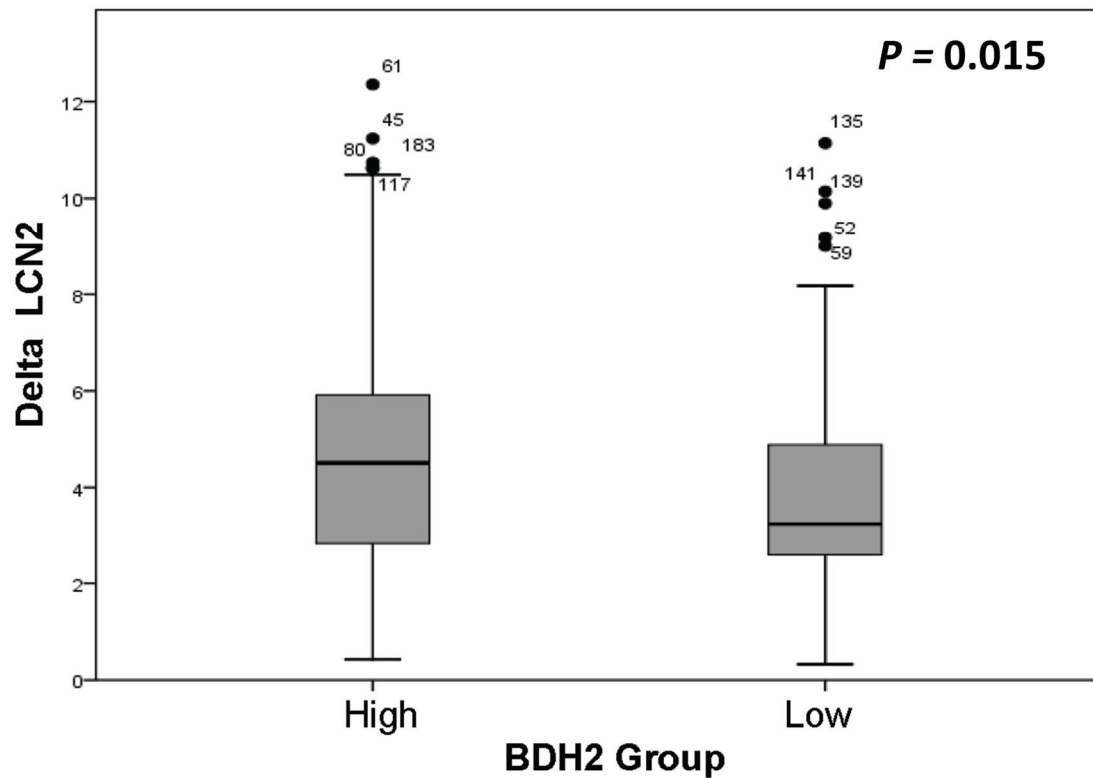

**Figure S1. *LCN2* mRNA expression in the bone marrow in high and low *BDH2***

**expression groups.** The expression levels *LCN2* were normalized to the internal control  $\beta$ -actin to obtain the relative threshold cycle ( $\Delta C_T$ ). *BDH2*, hydroxybutyrate dehydrogenase type 2; *LCN2*, lipocalin 2; qRT-PCR, quantitative reverse-transcription polymerase chain reaction.

**Figure S2.**

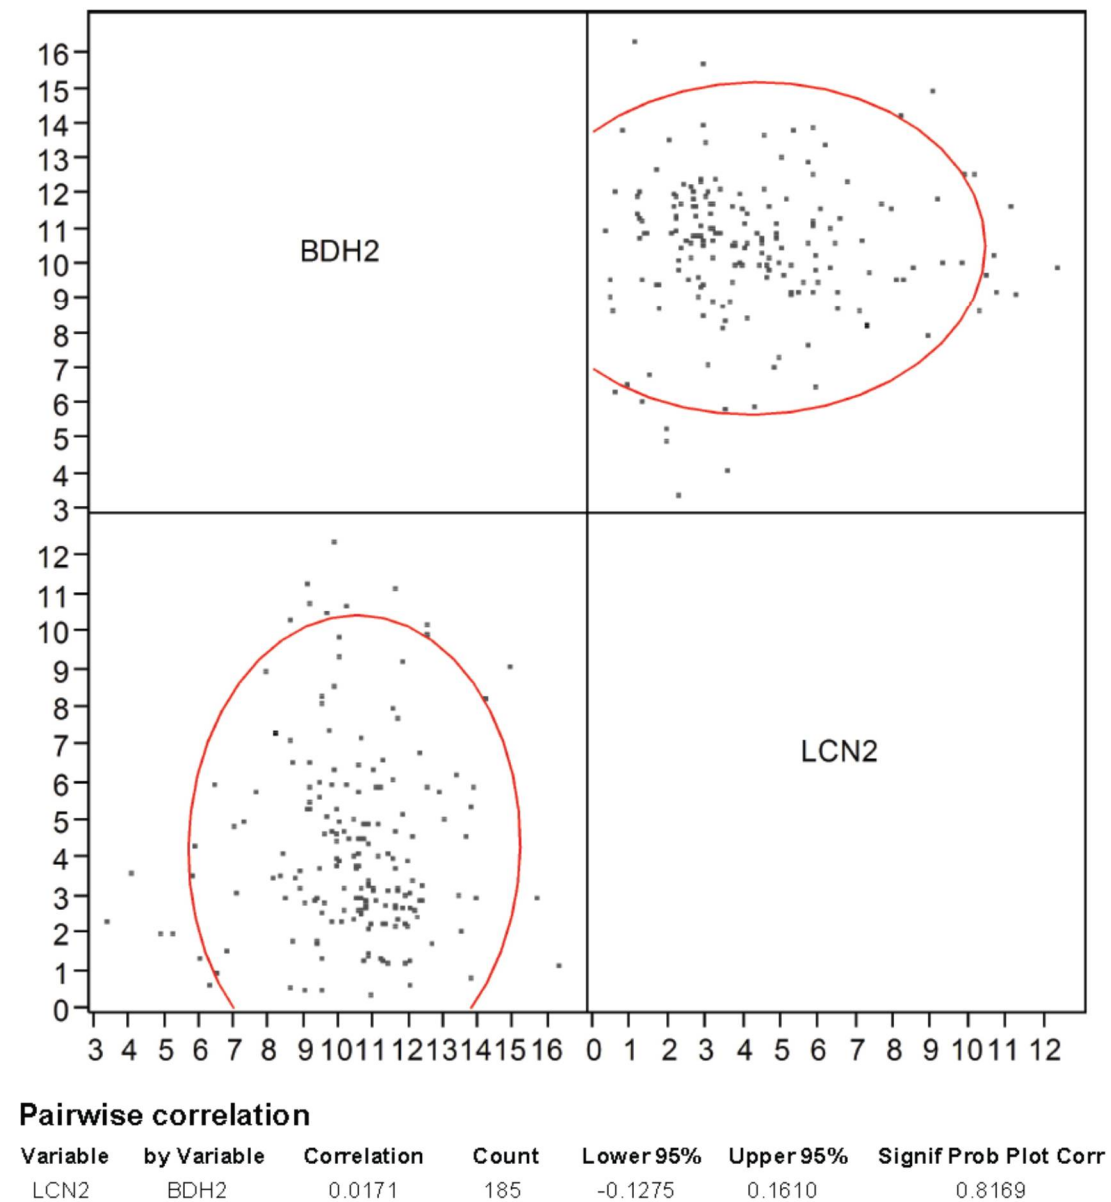

**Figure S2. The correlation between *BDH2* and *LCN2* mRNA expression in bone marrow of MDS patients.** There was no correlation between *BDH2* and *LCN2* mRNA expression in bone marrow of MDS patients. The expression levels of the *BDH2* and *LCN2* genes were normalized to the internal control  $\beta$ -actin to obtain the relative threshold cycle ( $\Delta C_T$ ). *BDH2*, hydroxybutyrate dehydrogenase type 2; *LCN2*, lipocalin 2.

**Figure S3.**

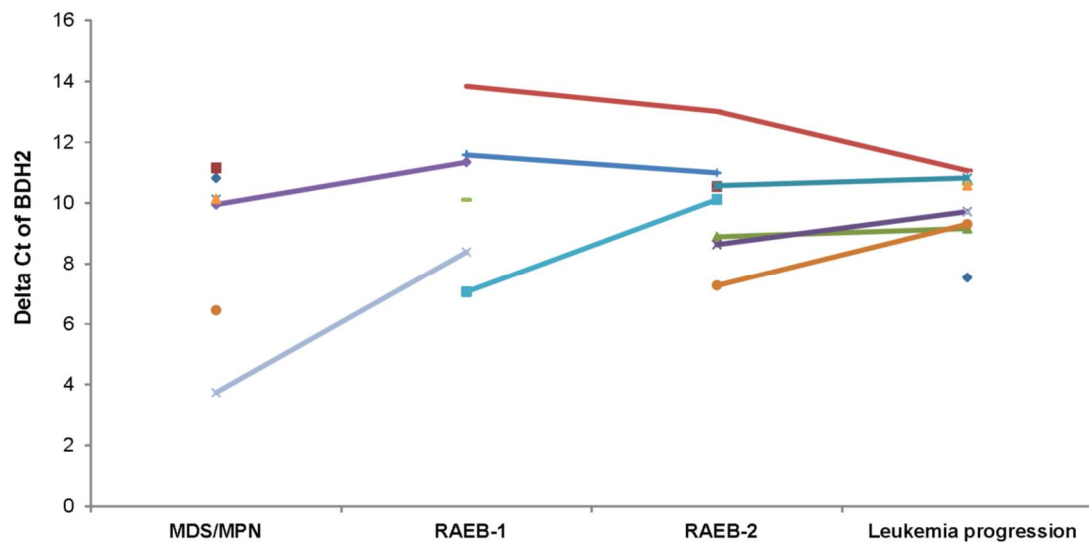

**Figure S3. Expression of *BDH2* mRNA expression in 13 MDS patients with series change.** BDH2, hydroxybutyrate dehydrogenase type 2; MDS, myelodysplastic syndrome; qRT-PCR, quantitative reverse-transcription polymerase chain reaction; RAEB, refractory anemia with excess blasts; RARS, refractory anemia with ringed sideroblasts.

Figure S4.

A

|                 |                     | <b>ferritin</b> | <b>BDH2</b> | <b>LCN2</b> |
|-----------------|---------------------|-----------------|-------------|-------------|
| <b>ferritin</b> | Pearson Correlation | 1               | -.074       | .111        |
|                 | P Value             |                 | .221        | .129        |
|                 | Number              | 115             | 109         | 107         |
| <b>BDH2</b>     | Pearson Correlation | -.074           | 1           | .017        |
|                 | P Value             | .221            |             | .408        |
|                 | Number              | 109             | 187         | 185         |
| <b>LCN2</b>     | Pearson Correlation | .111            | .017        | 1           |
|                 | P Value             | .129            | .408        |             |
|                 | Number              | 107             | 185         | 185         |

B

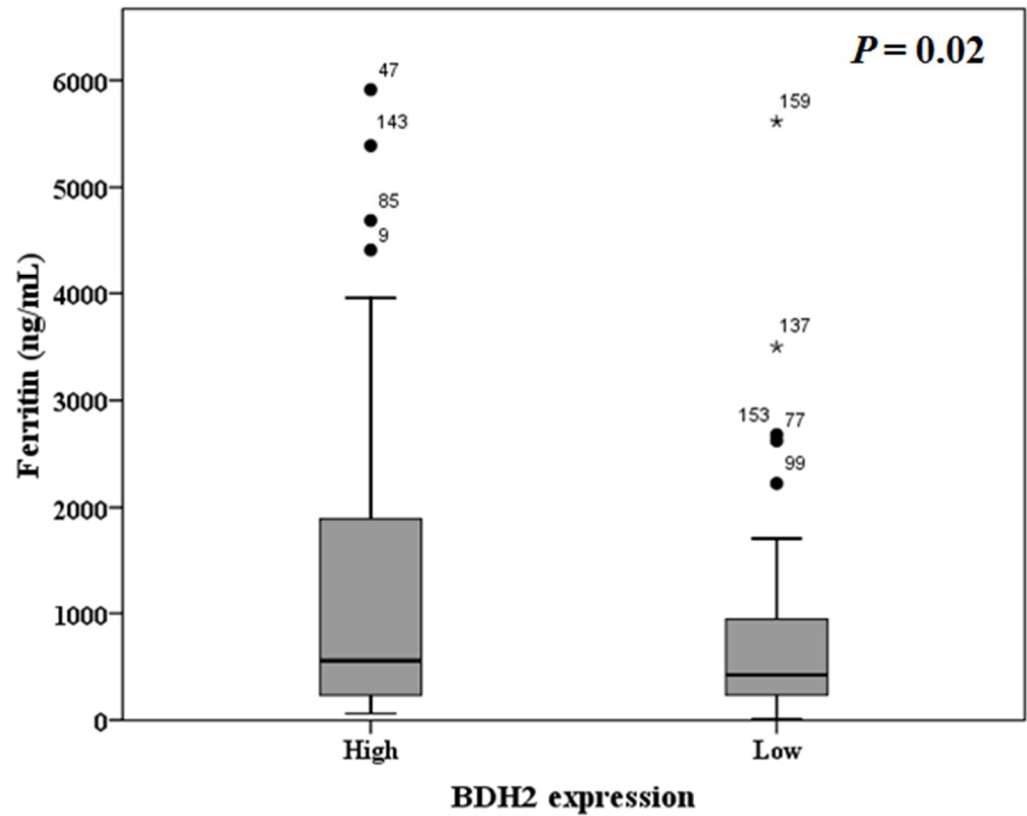

**Figure S4. Correlation between serum ferritin levels and the expression levels of *BDH2* and *LCN2*.** Ferritin levels were obtained for 115 patients who did not undergo repeated blood transfusion. (A) Correlation regression analysis was used to assess the correlation between *BDH2* and *LCN2* expression and *BDH2* and ferritin levels. (B) Ferritin levels were compared between the high and low *BDH2* expression groups. BDH2, hydroxybutyrate dehydrogenase type 2; LCN2, lipocalin 2.

Figure S5.

A

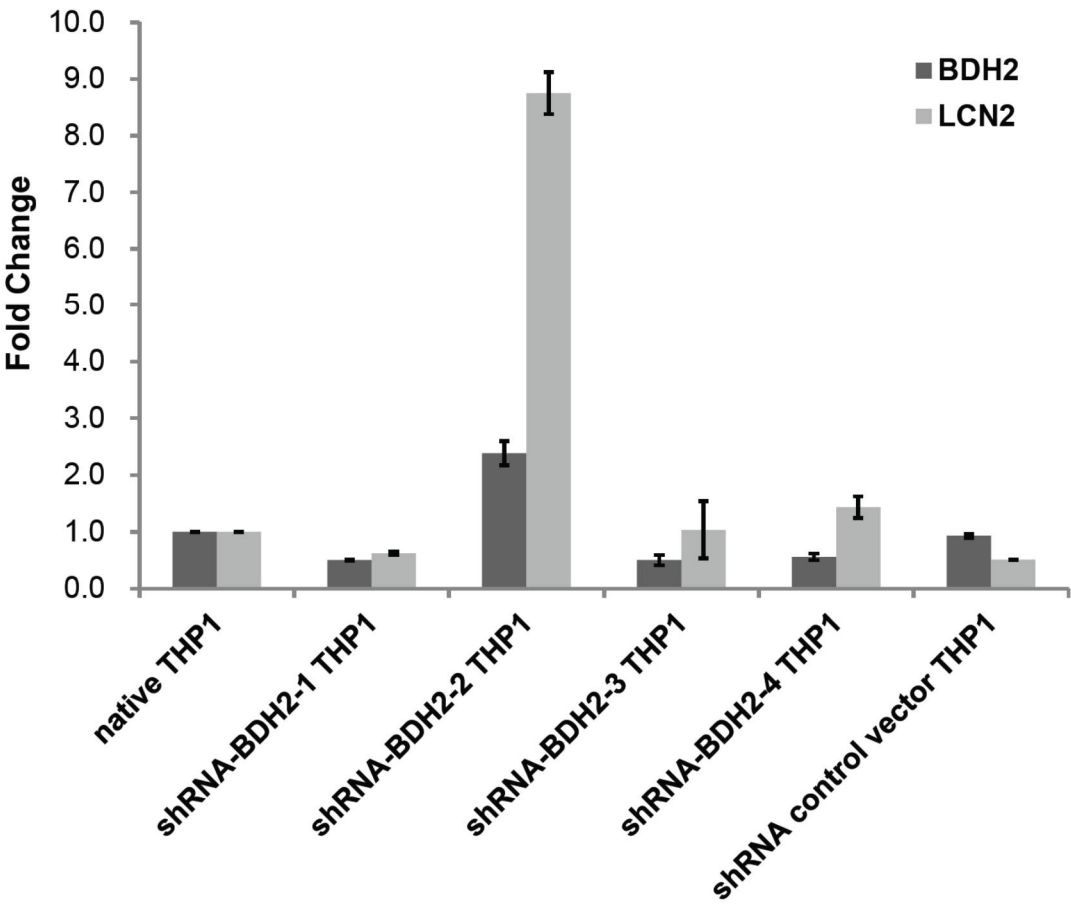

B

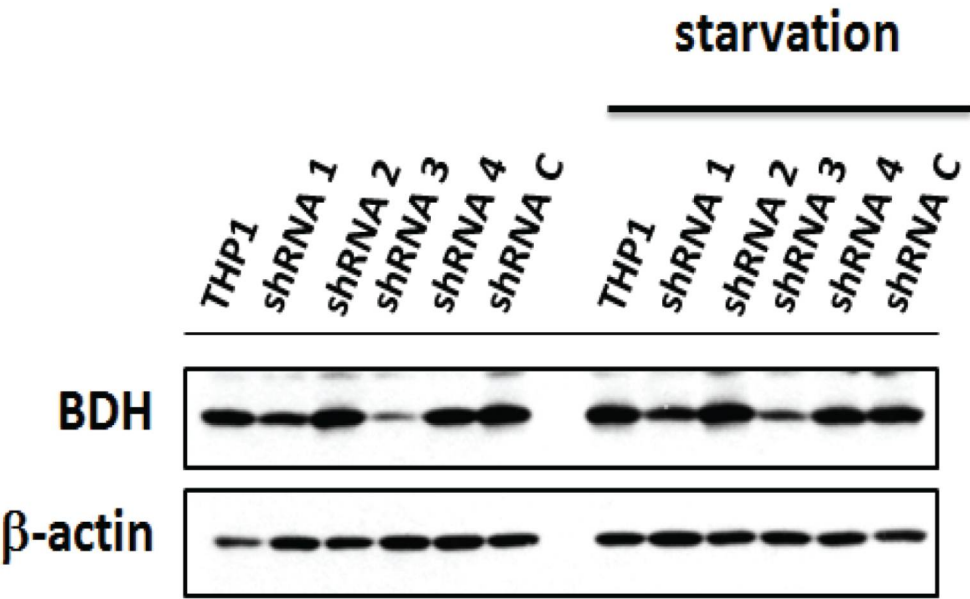

**Figure S5. The efficiency of shRNA interference of BDH2 in THP1 cells.**

BDH2-KD efficiency of four different clones, shRNA-BDH2-1, shRNA-BDH2-2, shRNA-BDH2-3, and shRNA-BDH2-4 was assessed by (A) quantitative reverse-transcription polymerase chain reaction and, (B) western blot analyses. The mRNA expression levels of the *BDH2* and *LCN2* genes were normalized to the internal control  $\beta$ -actin to obtain the relative threshold cycle ( $\Delta C_T$ ). For western blot analysis, antibodies specific for BDH and  $\beta$ -actin were used. BDH2 expression groups, respectively. BDH2, hydroxybutyrate dehydrogenase type 2; KD: knockdown; LCN2, lipocalin 2.

**Figure S6.**

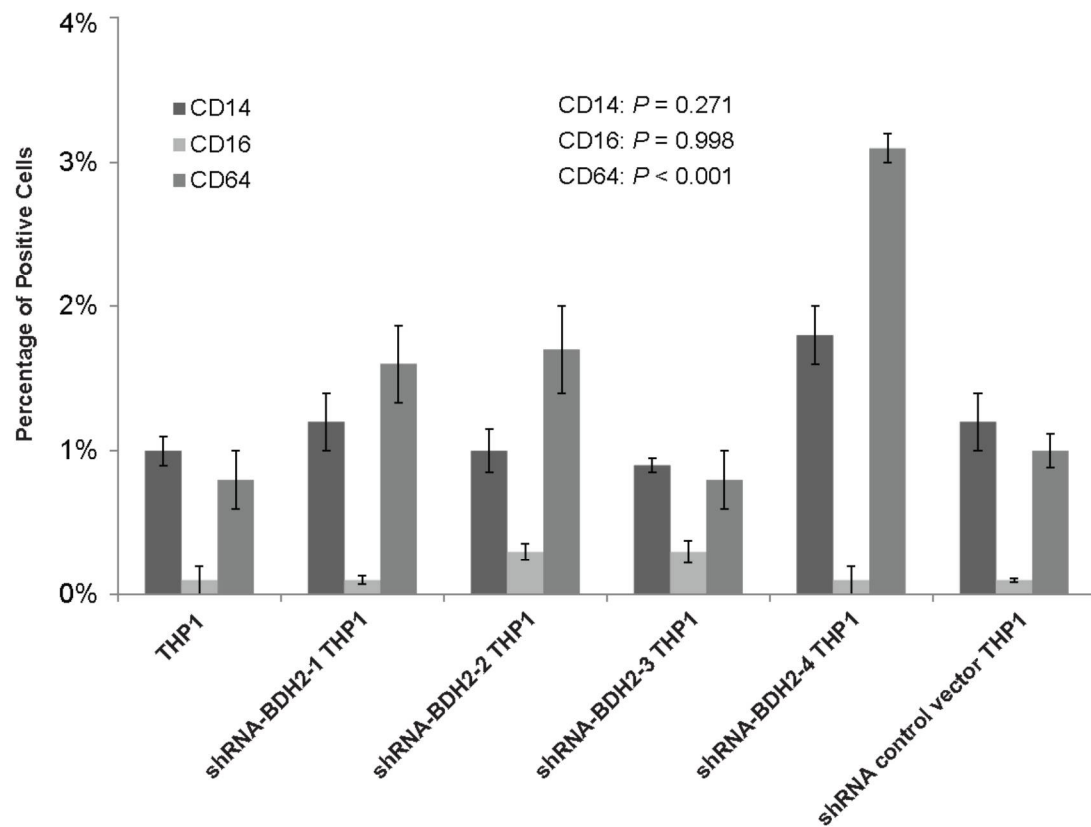

**Figure S6. Surface markers indicate THP1 cells differentiation.** CD14, CD16, and CD64 expression in THP1 and BDH2-KD THP1 cells, after treated with Vitamin D3 to induce differentiation. Only CD64 had significant difference between BDH2-KD and control THP1 cells. However, there was no correlation with BDH2 knockdown levels. BDH2, hydroxybutyrate dehydrogenase type 2.

**Figure S7.**

**A**

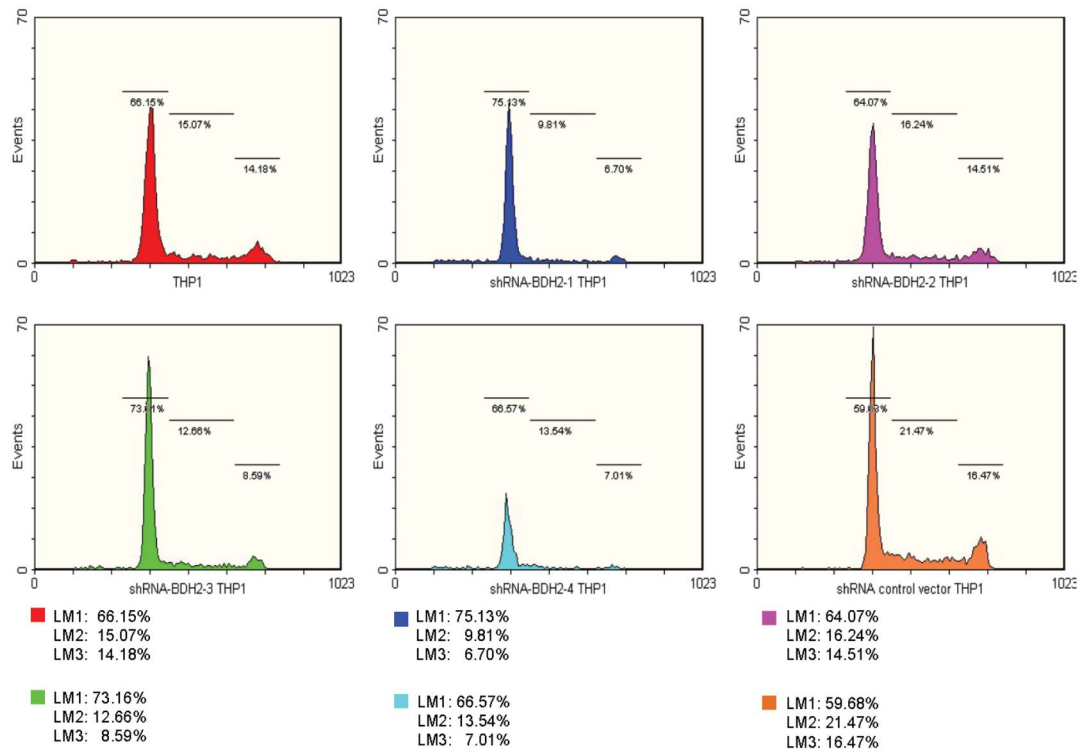

**B**

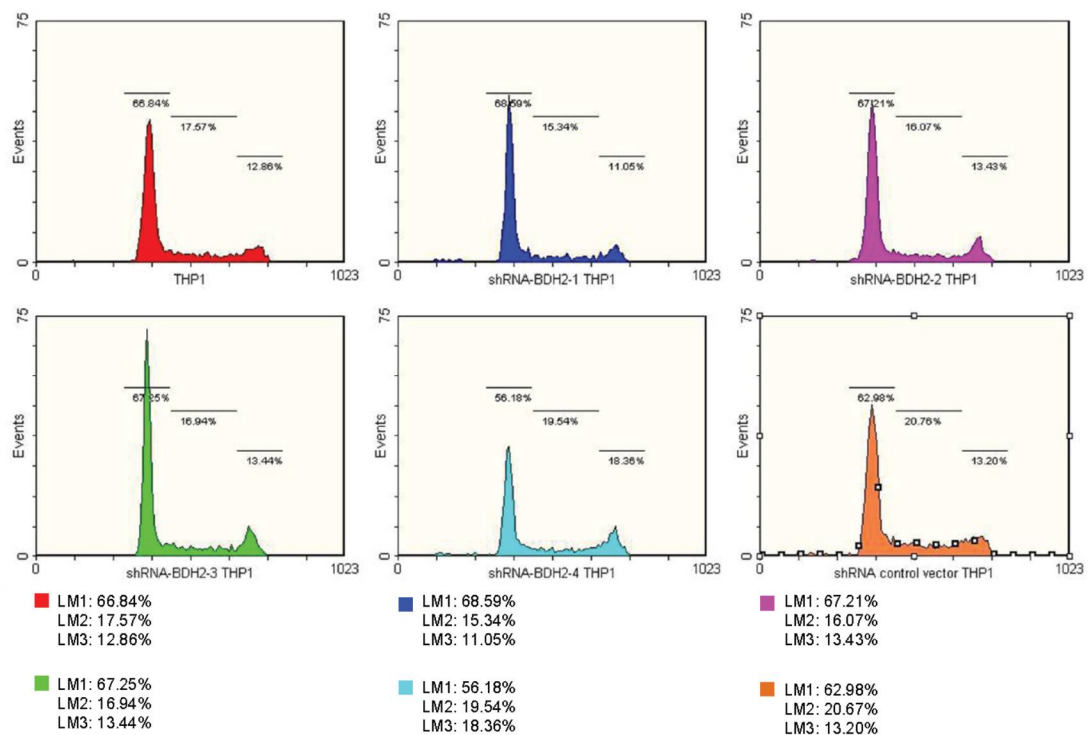

**Figure S7.** Cell cycle in shRNA control vector transfected THP1 cells. THP1 cells

were cultured in serum-free medium for 2 days to induce cell cycle arrest. The

medium was supplemented with 0.2% FBS and 1% FBS for a day each. Ten percent FBS was added to the culture medium to restart the cell cycle. Cell cycle profile on the (A) third and, (B) fourth day after re-growth in serum-containing medium. FBS, fetal bovine serum.

**Figure S8.**

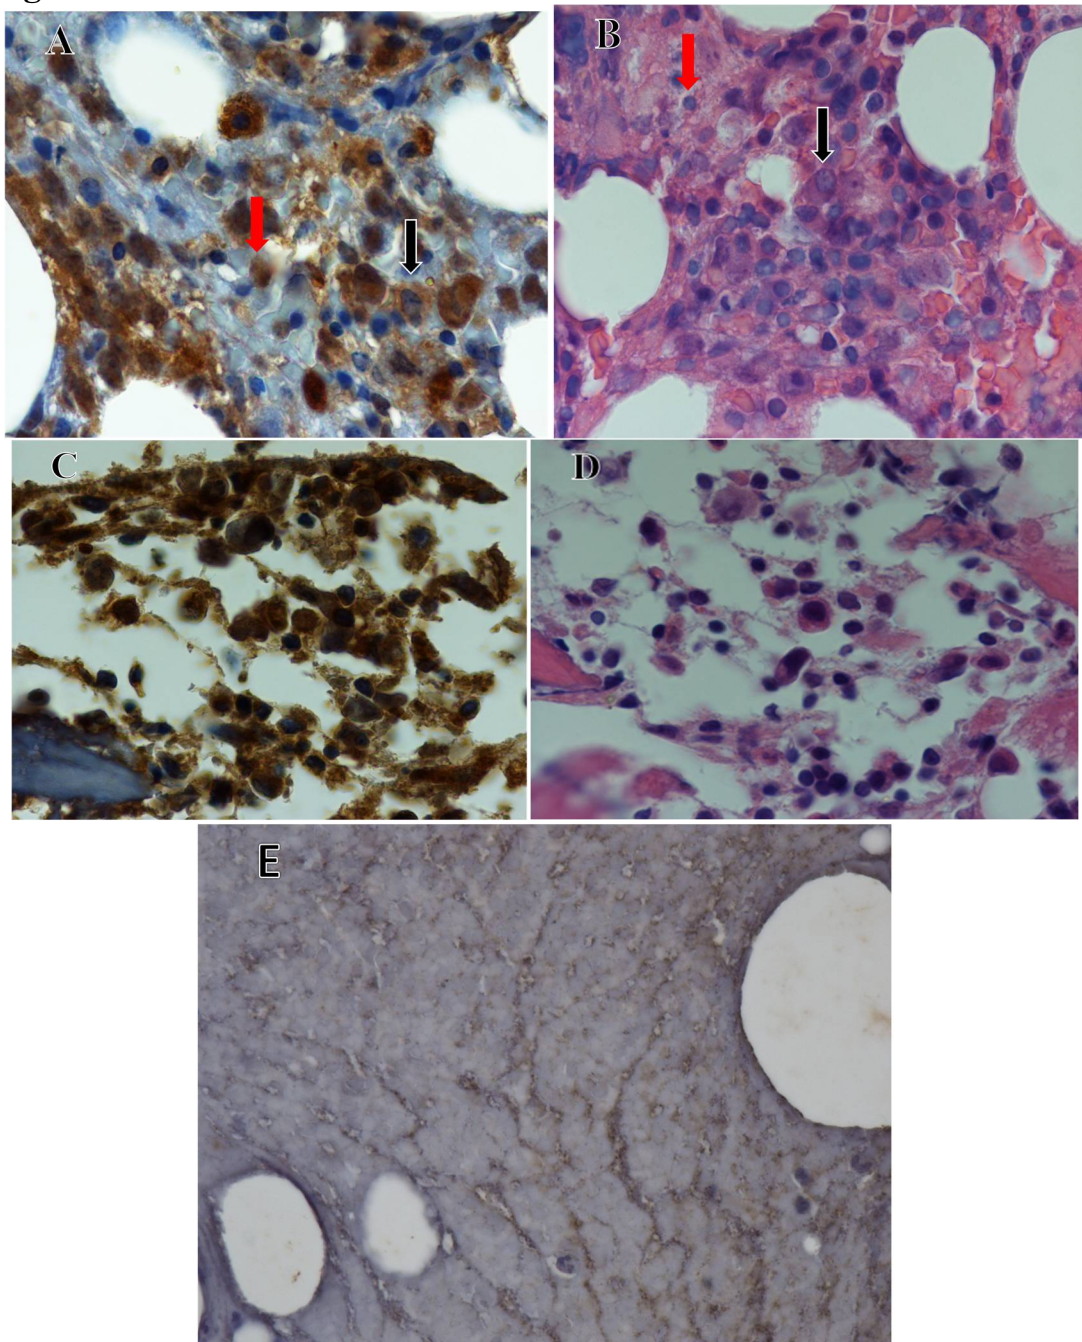

**Figure S8. BDH2 protein expressions in the bone marrow.** (A, C) The expression of BDH2 in the bone marrow of MDS patients was determined by immunohistochemistry using a monoclonal antibody specific for human BDH2. (B, D) The slides were counterstained with hematoxylin. The panels A and B were from

patients with high, and panels C and D were from patients with low expression of BDH2 in the bone marrow. (E) Control slide without using BDH2 antibody. The red arrows indicate normoblasts, which belong to erythroid series. The black arrows show myeloblasts.400x. BDH2, hydroxybutyrate dehydrogenase type 2.

**Figure S9**

THP1C cells    BDH2-KD THP1 cells

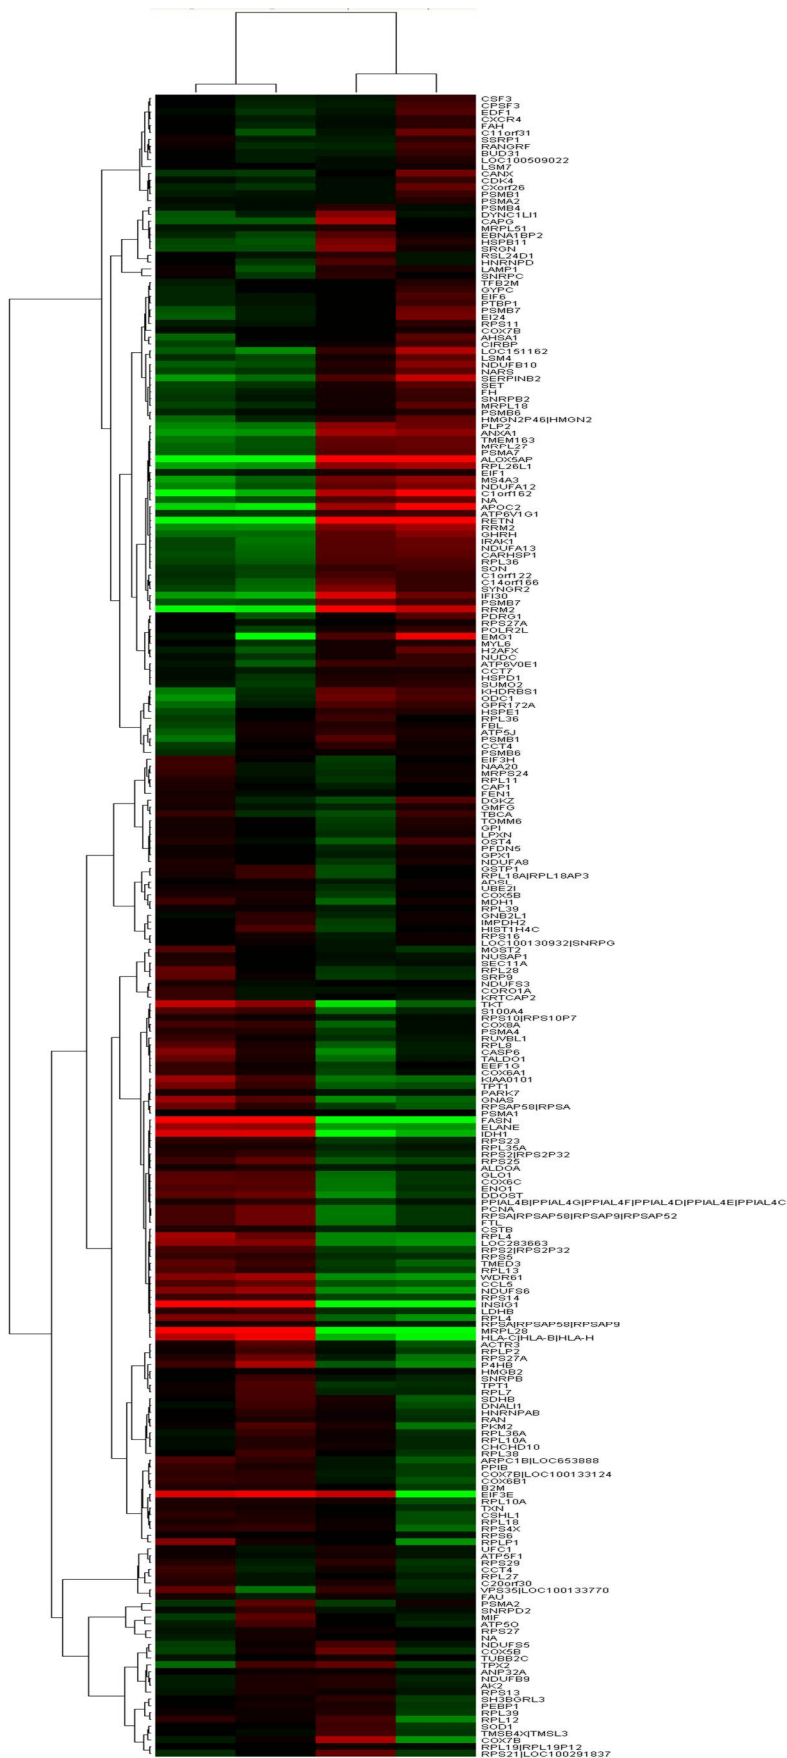

**Figure S9.** RNA microarray analysis between shRNA control vector transfected THP1 (THP1C, left two columns) and BDH2-KD THP1 cells (right two columns).

**Supplement Table 1.** Microarray analysis of BDH2-KD THP1 cells

| <b>Gene symbol</b> | <b>ID</b>     | <b>Description</b>                                                                          | <b>Log2 (T/C)#</b> | <b>P value</b> |
|--------------------|---------------|---------------------------------------------------------------------------------------------|--------------------|----------------|
| NNT                | PH_hs_0022275 | nicotinamide nucleotide transhydrogenase                                                    | -1.12396           | 2.43E-10*      |
| SLC25A1            | PH_hs_0031529 | solute carrier family 25 (mitochondrial carrier; citrate transporter), member 1             | -1.16844           | 0.000258*      |
| GBAS               | PH_hs_0009186 | glioblastoma amplified sequence                                                             | -1.04885           | 0.000001*      |
| POLG               | PH_hs_0023529 | polymerase (DNA directed), gamma                                                            | -1.02335           | 0.000077*      |
| TGFBR1             | PH_hs_0022072 | transforming growth factor, beta receptor I (activin A receptor type II-like kinase, 53kDa) | 1.238682           | 0.000391*      |
| SMAD3              | PH_hs_0039929 | SMAD, mothers against DPP homolog 3 (Drosophila)                                            | -1.145608          | 0.000305*      |
| PIK3CD             | PH_hs_0033291 | phosphoinositide-3-kinase, catalytic, delta polypeptide                                     | -1.06438           | 0*             |
| CAB39L             | PH_hs_0048501 | calcium binding protein 39-like                                                             | -1.732699          | 9.12E-13*      |
| CREB3L2            | PH_hs_0022159 | cAMP responsive element binding protein 3-like 2                                            | -1.073542          | 0.00007*       |
| MAPK9              | PH_hs_0045819 | mitogen-activated protein kinase 9                                                          | 1.177353           | 0.000016*      |
| PRL                | PH_hs_0035318 | prolactin                                                                                   | 1.572641           | 1.64E-13*      |
| TP53INP2           | PH_hs_0001086 | tumor protein p53 inducible                                                                 | -1.58863408925472  | 2.36E-10*      |
| CCL20              | PH_hs_0004333 | chemokine (C-C motif) ligand 20                                                             | 1.599742           | 6.64E-10*      |
| IL8                | PH_hs_0000069 | interleukin 8                                                                               | 1.462731           | 2.17E-08*      |
| TNFSF13B           | PH_hs_0013929 | tumor necrosis factor (ligand) superfamily, member 13b                                      | -1.104741          | 3.51E-08*      |

|       |               |                                       |           |           |
|-------|---------------|---------------------------------------|-----------|-----------|
| MMP9  | PH_hs_0009143 | matrix<br>metallopeptidase 9          | -2.101386 | 1.34E-10* |
| CXCR2 | PH_hs_0000102 | chemokine (C-X-C motif)<br>receptor 2 | 0.877452  | 0.021231  |

#T: BDH2-KD THP1 cells; C: control vector transfection THP1 cells

\*statistics significant;  $P < 0.01$
